# Supplementary material for: Development of amplified fragment length polymorphism (AFLP) markers for the identification of Cholistani cattle
Source: Copernicus journal article supplement (doi:10.5194/aab-61-387-2018), 2018-10-12

Supplement of Arch. Anim. Breed., 61, 387–394, 2018  
<https://doi.org/10.5194/aab-61-387-2018-supplement>  
© Author(s) 2018. This work is distributed under  
the Creative Commons Attribution 4.0 License.

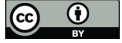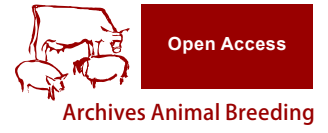

*Supplement of*

## **Development of amplified fragment length polymorphism (AFLP) markers for the identification of Cholistani cattle**

**Muhammad Haseeb Malik et al.**

*Correspondence to:* Muhammad Moaen-ud-Din ([drmoianawan@gmail.com](mailto:drmoianawan@gmail.com))

The copyright of individual parts of the supplement might differ from the CC BY 4.0 License.

## Supplementary file

*Samples collection*

*Samples collection from BLPRI Khairimurat and field*

Figures: Samples collection from BLPRI Khairimurat and field

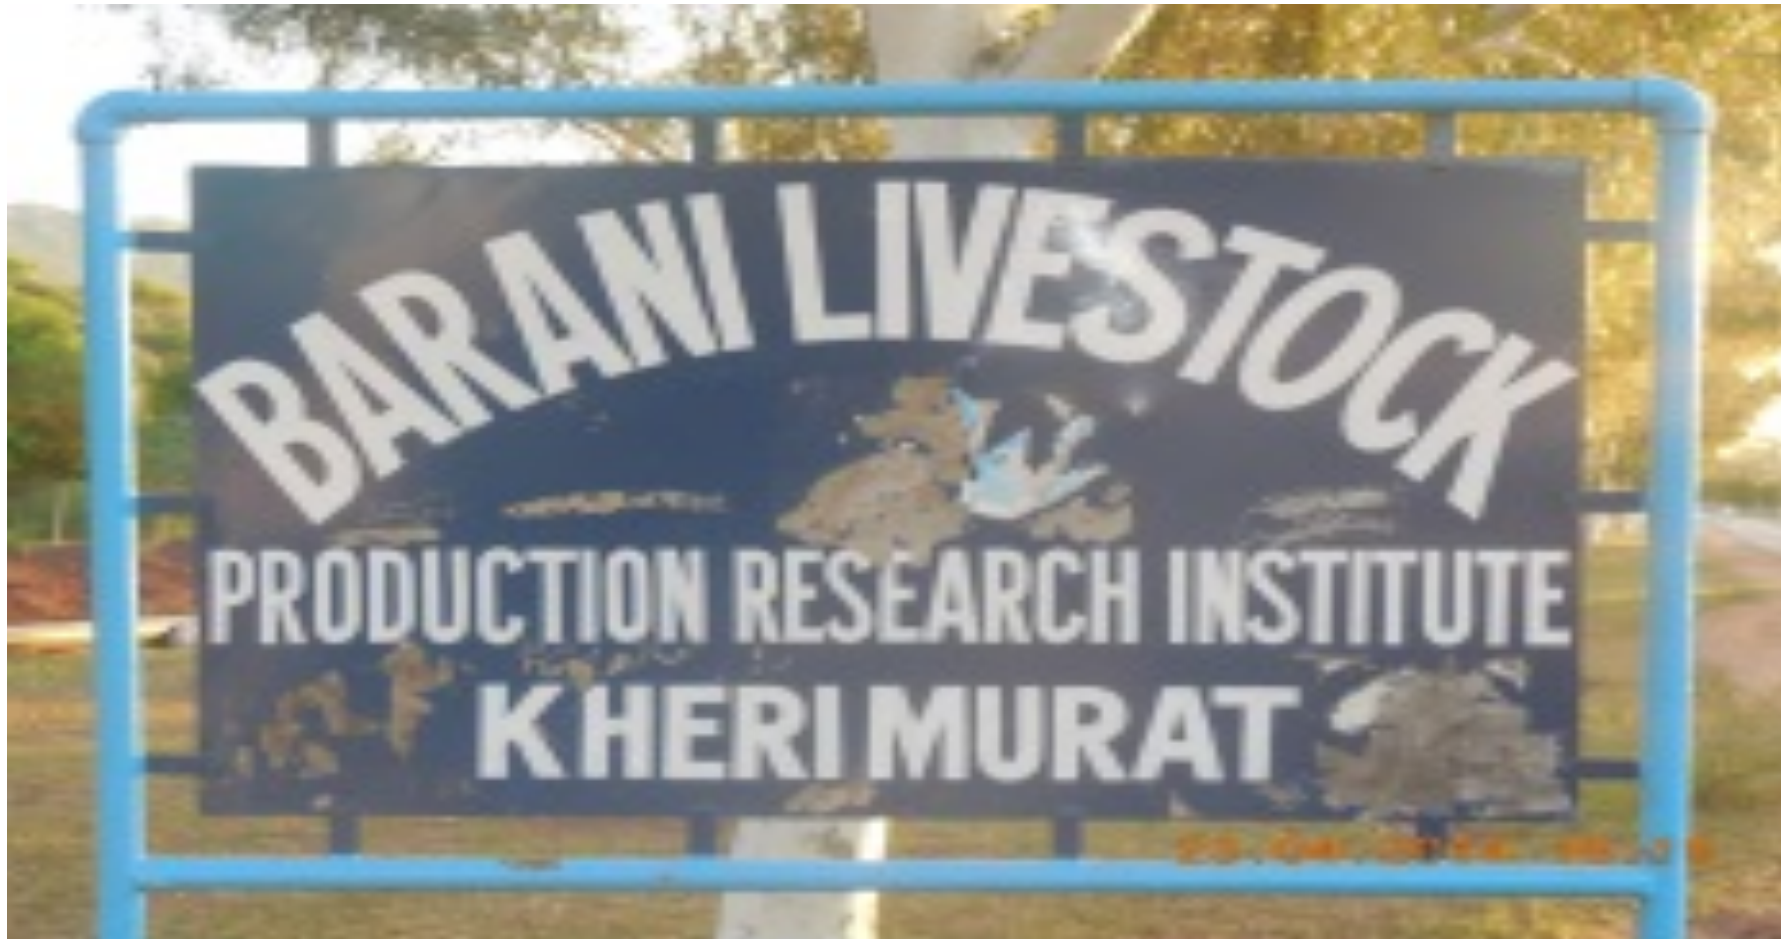

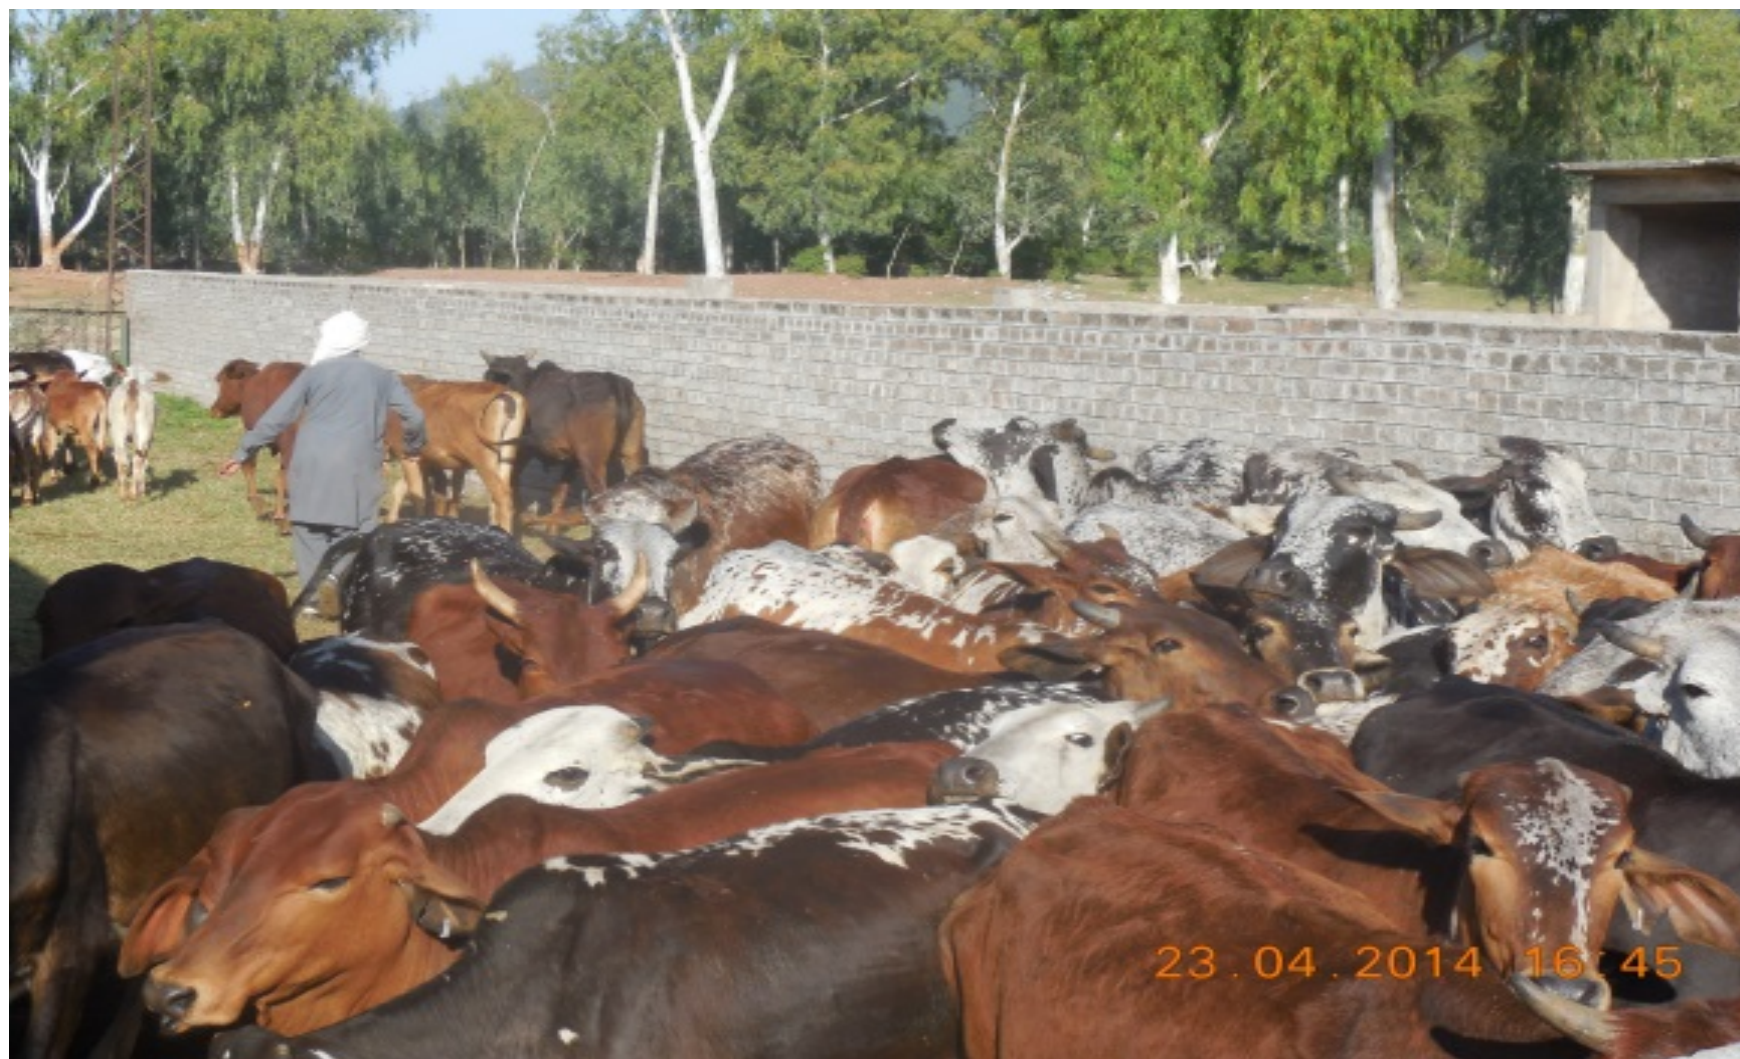

Cholistani

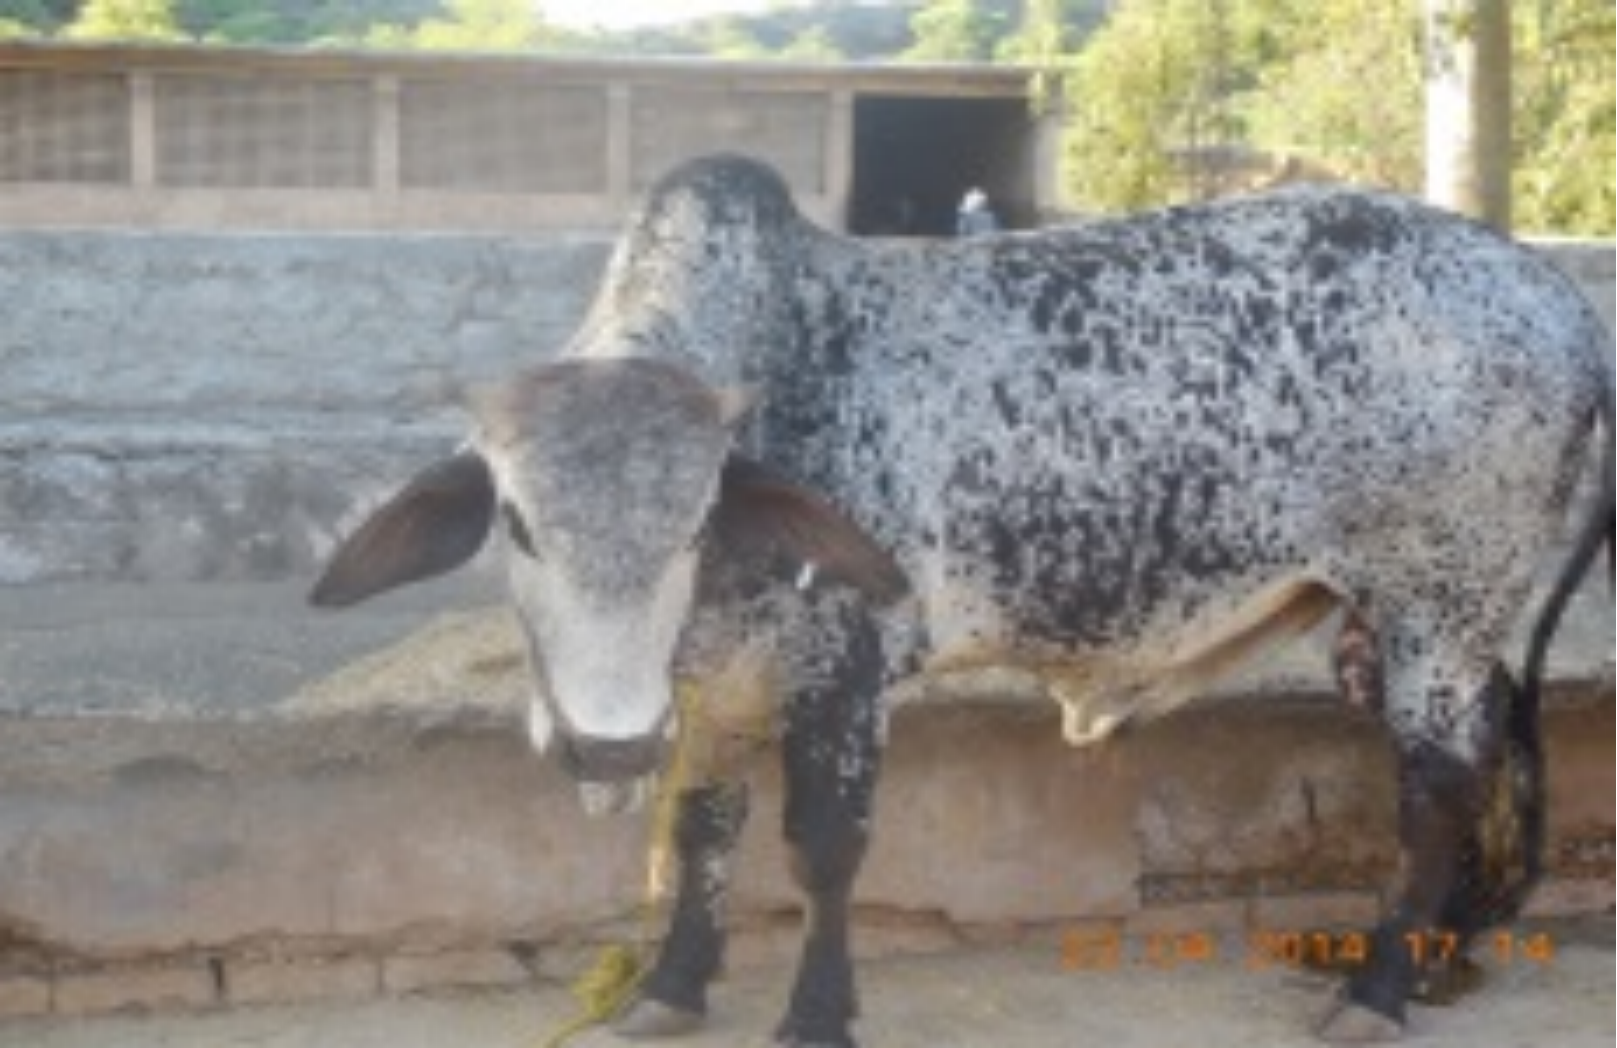

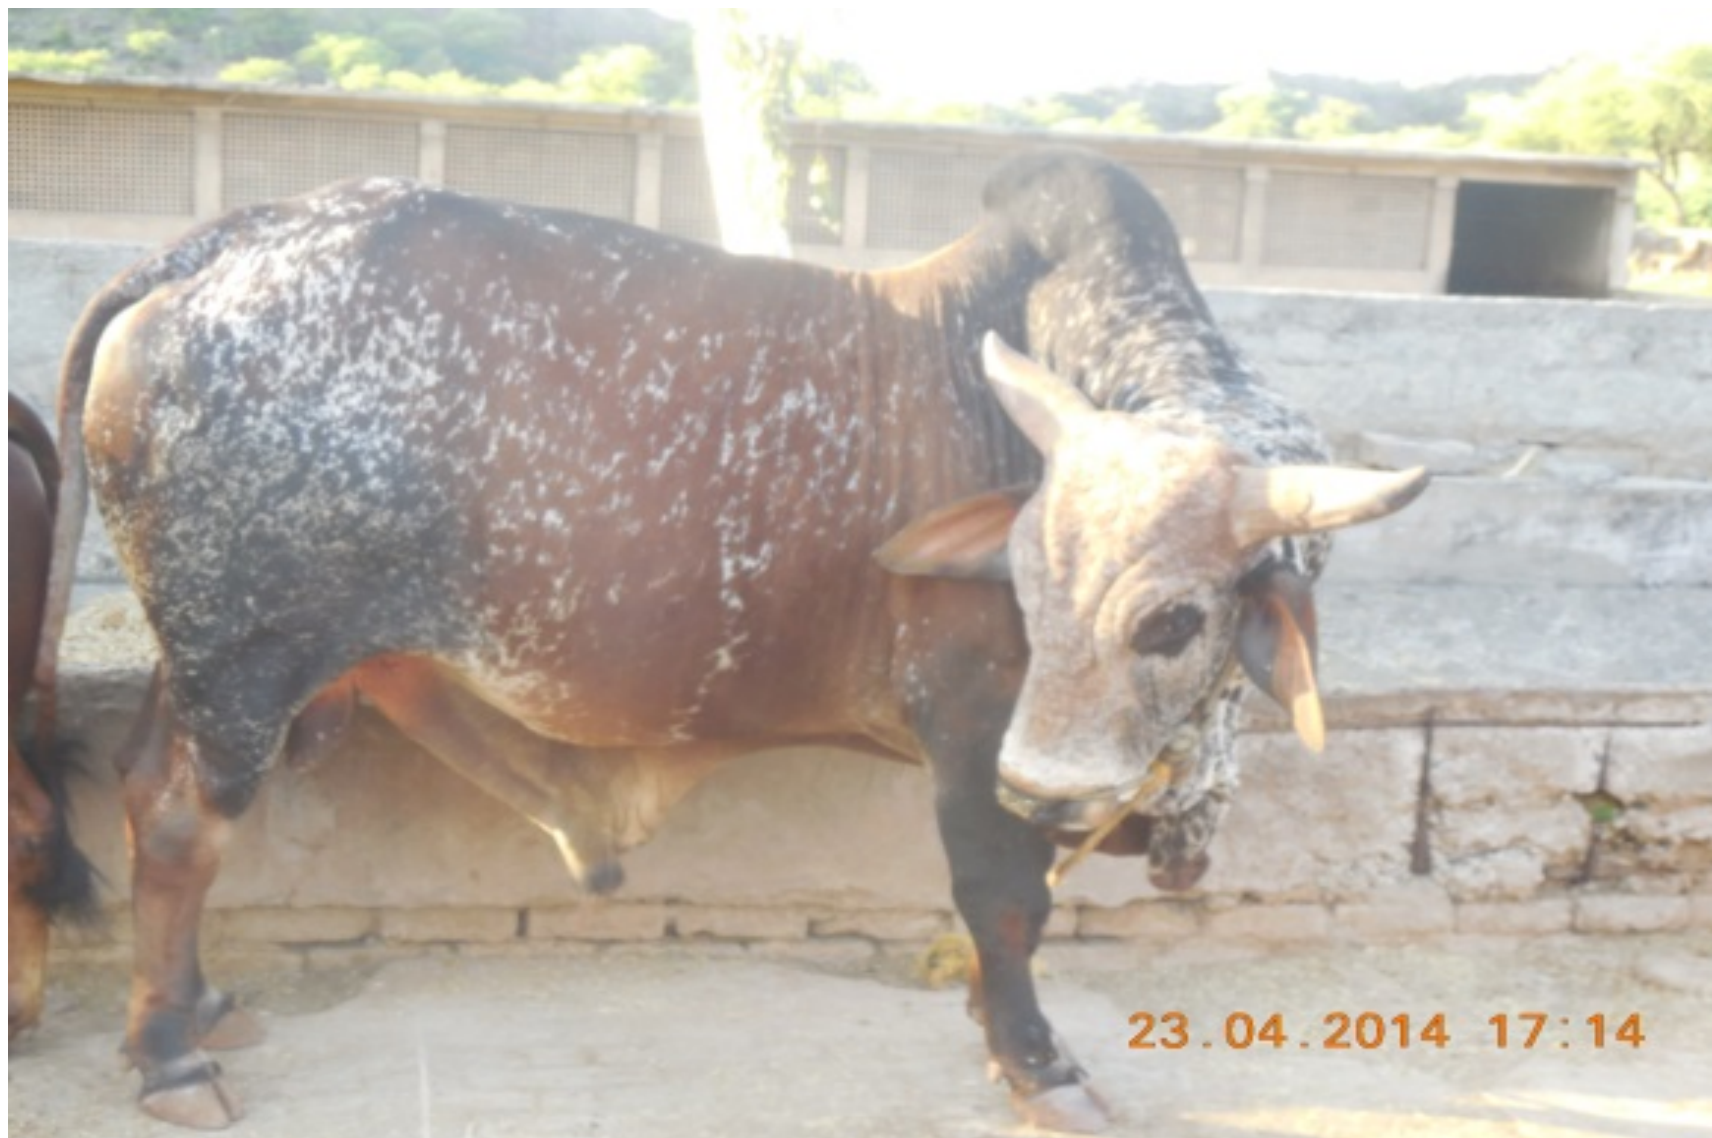

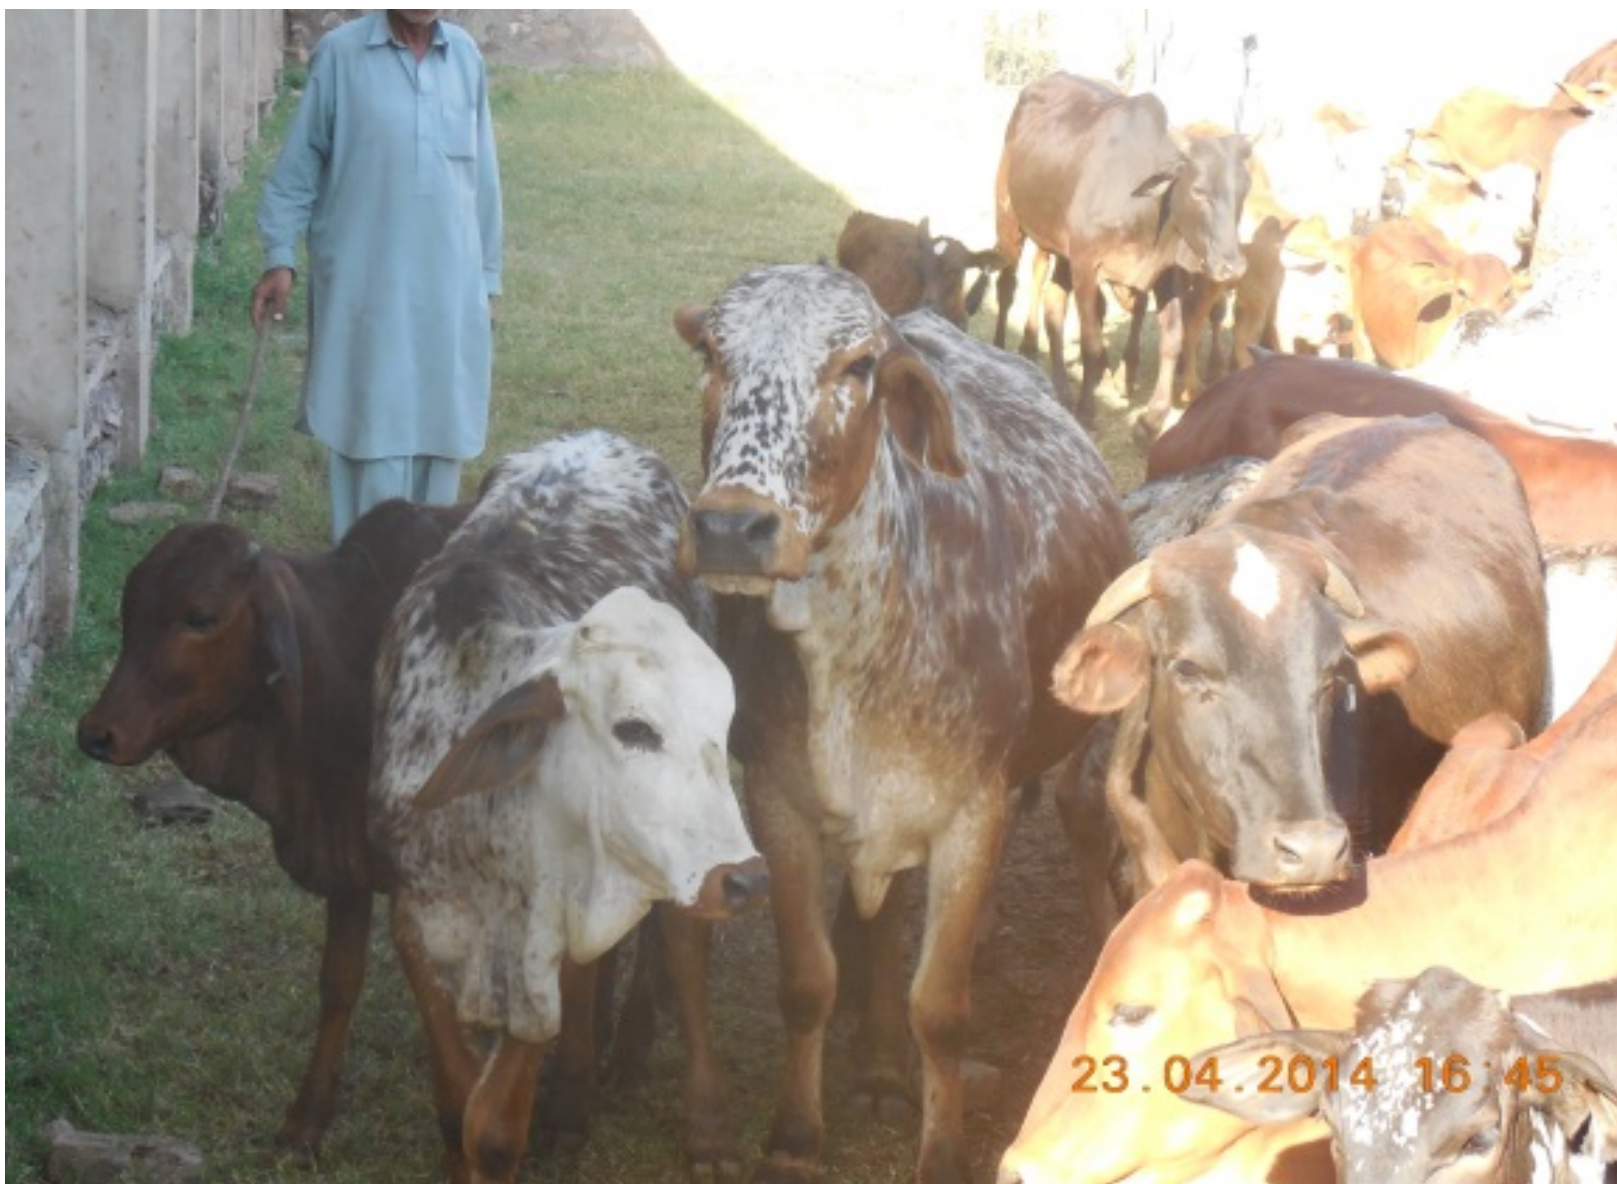

*Samples collection from SPU Qadarabad, SPU Karaniwala, LES Jugeetpir and field*

**Figure 1: Samples collection from SPU Qadarabad, SPU Karaniwala, LES Jugeetpir and field**

Cholistani

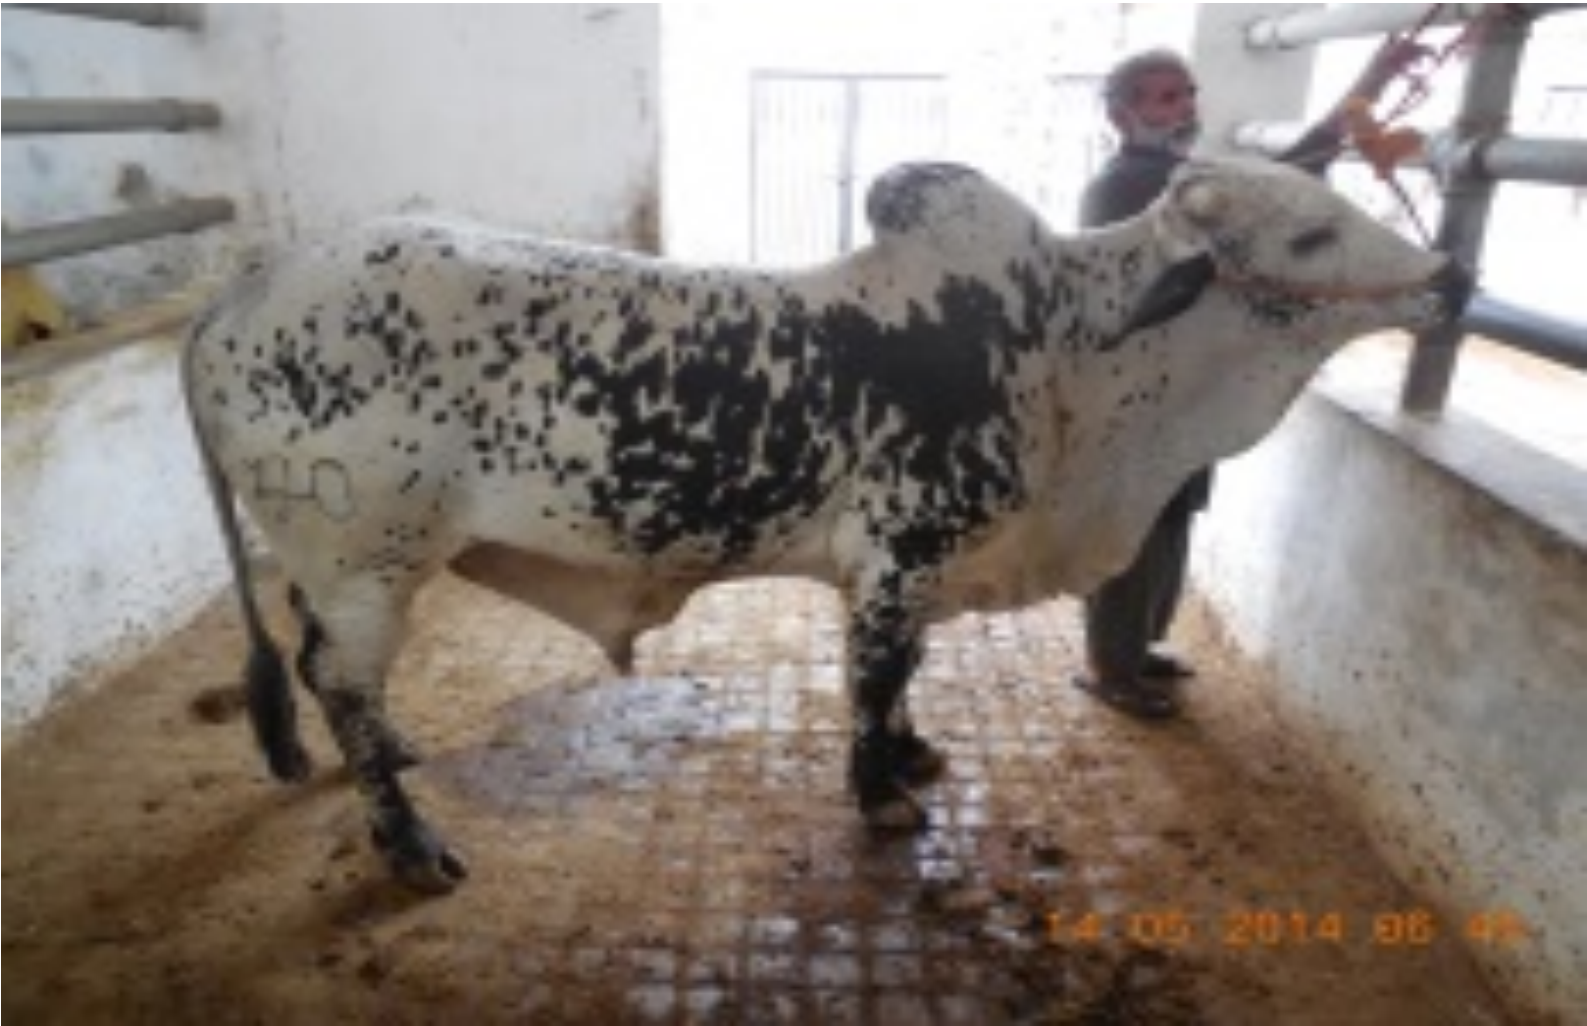

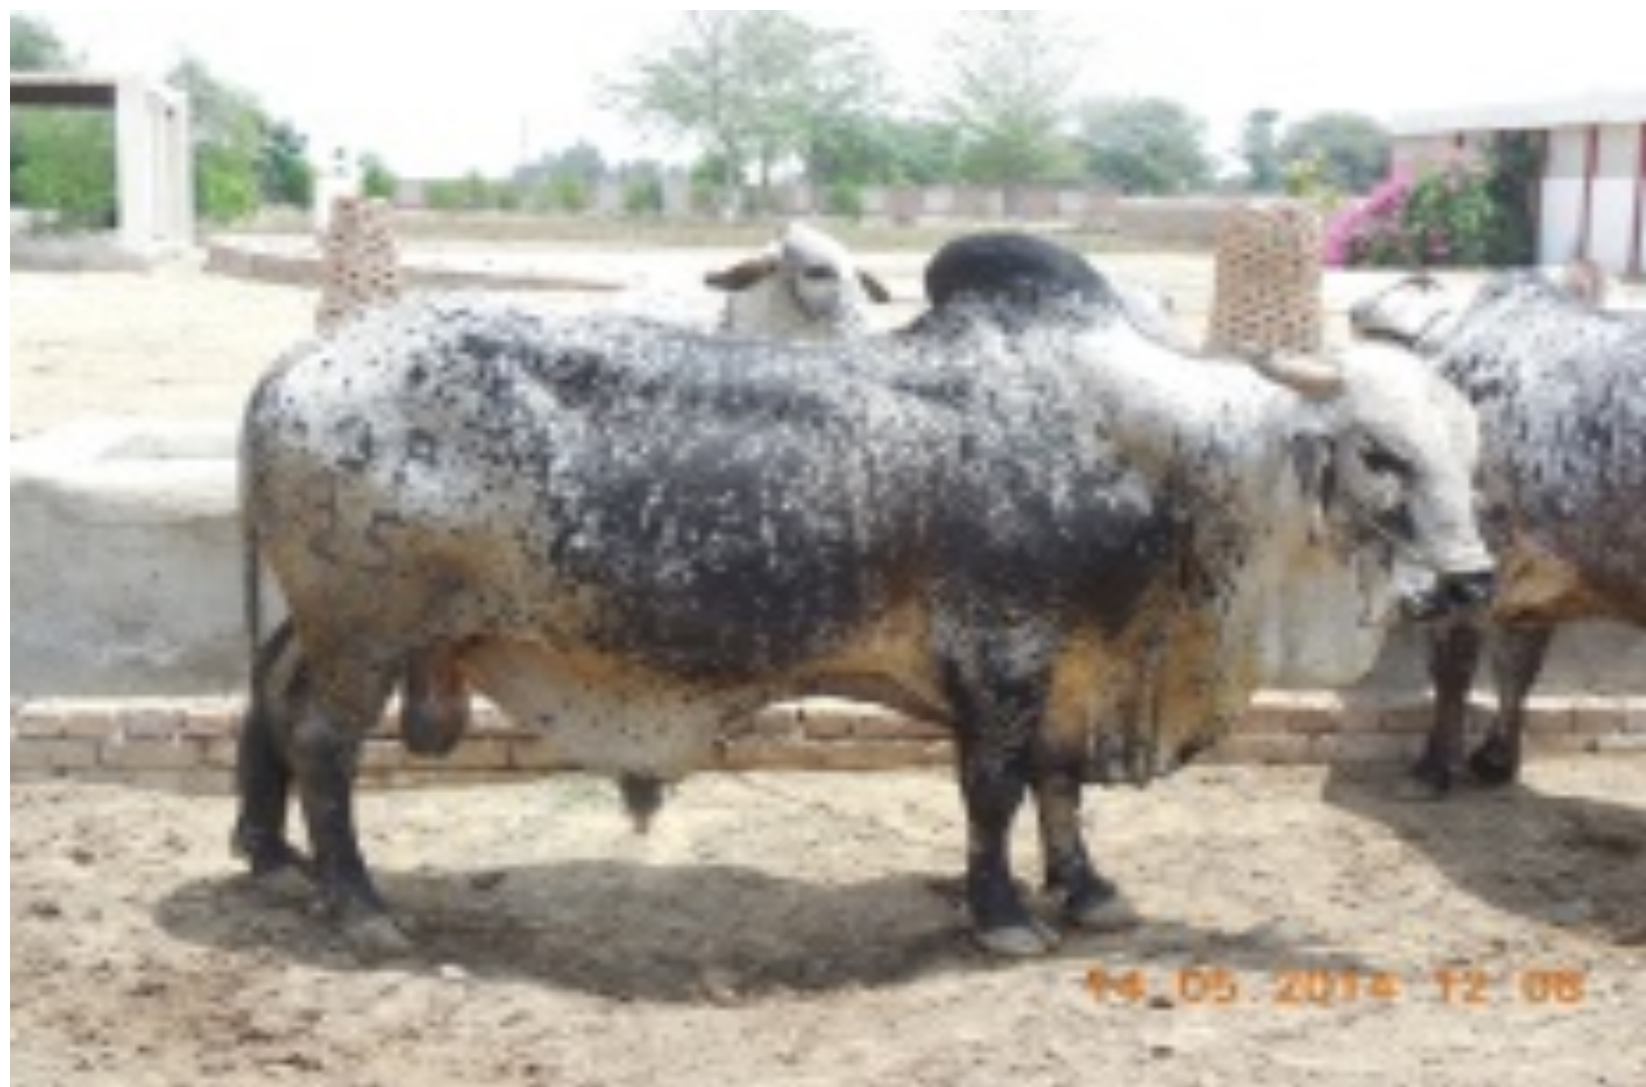



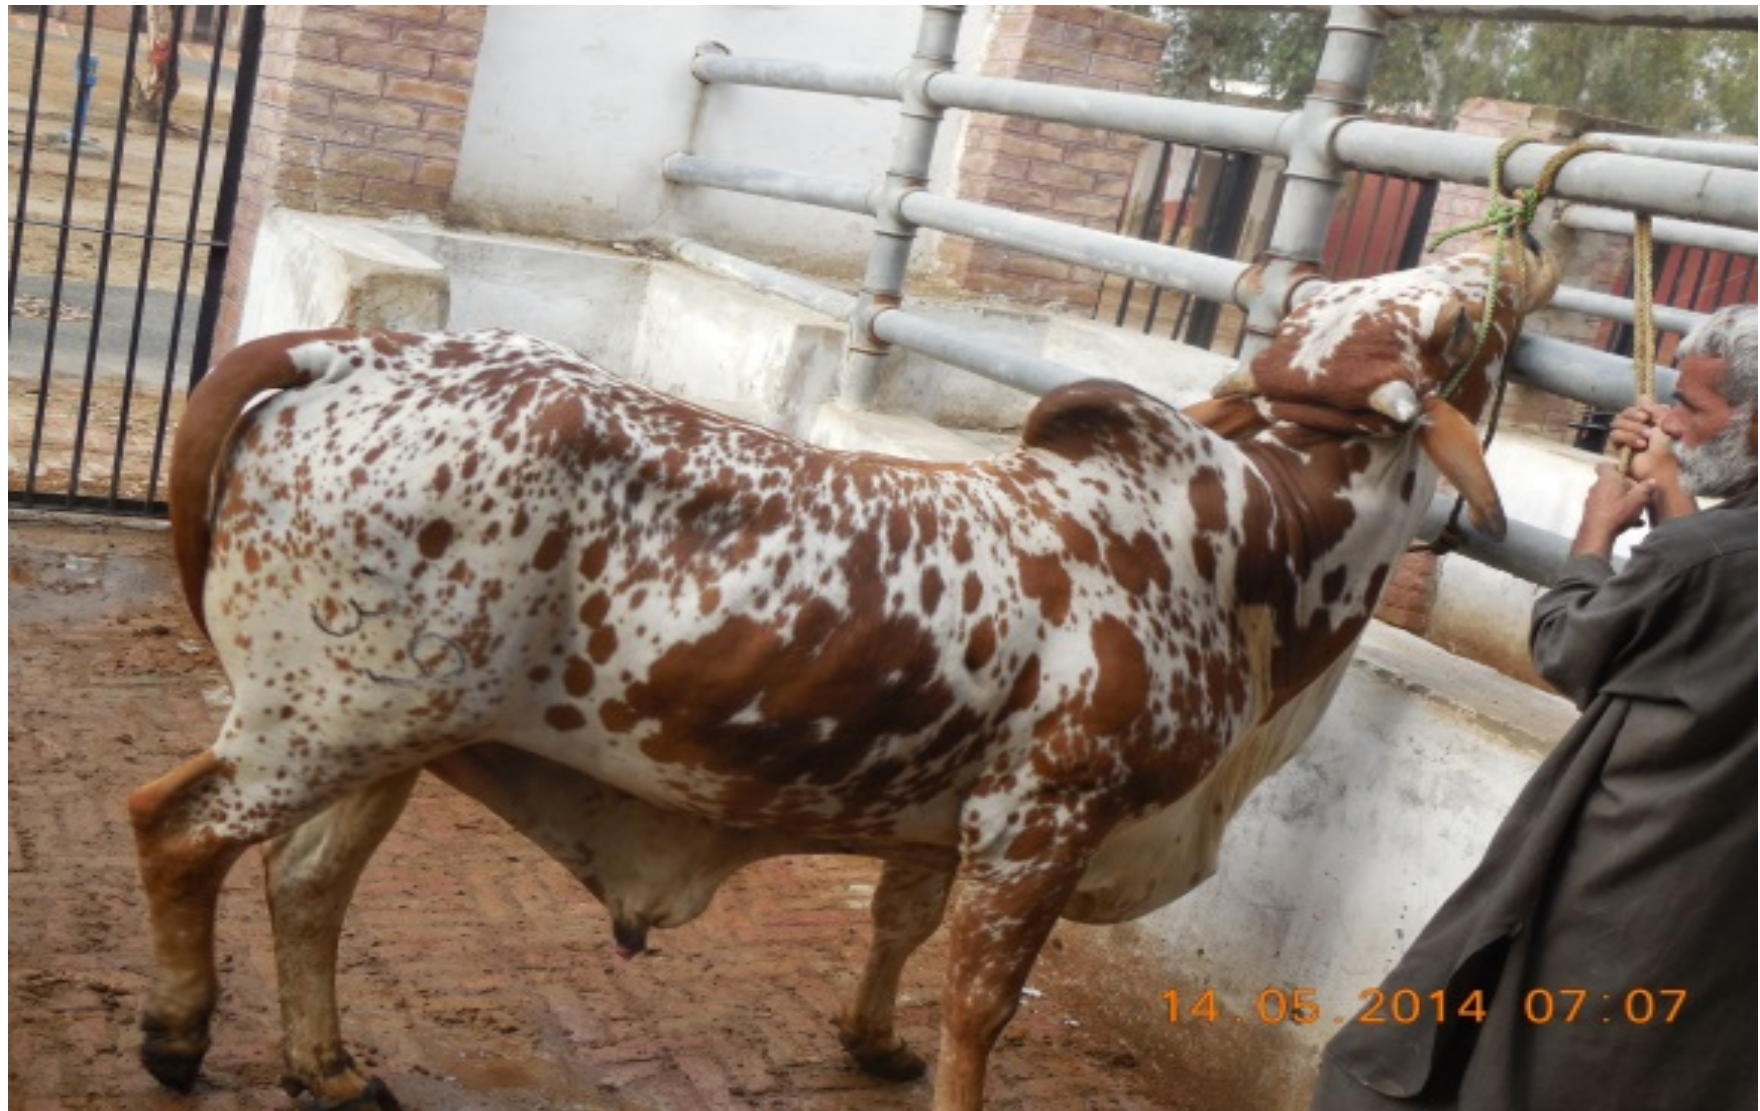

14.05.2014 07:07

**Figure: DNA extracted from sampled animals**

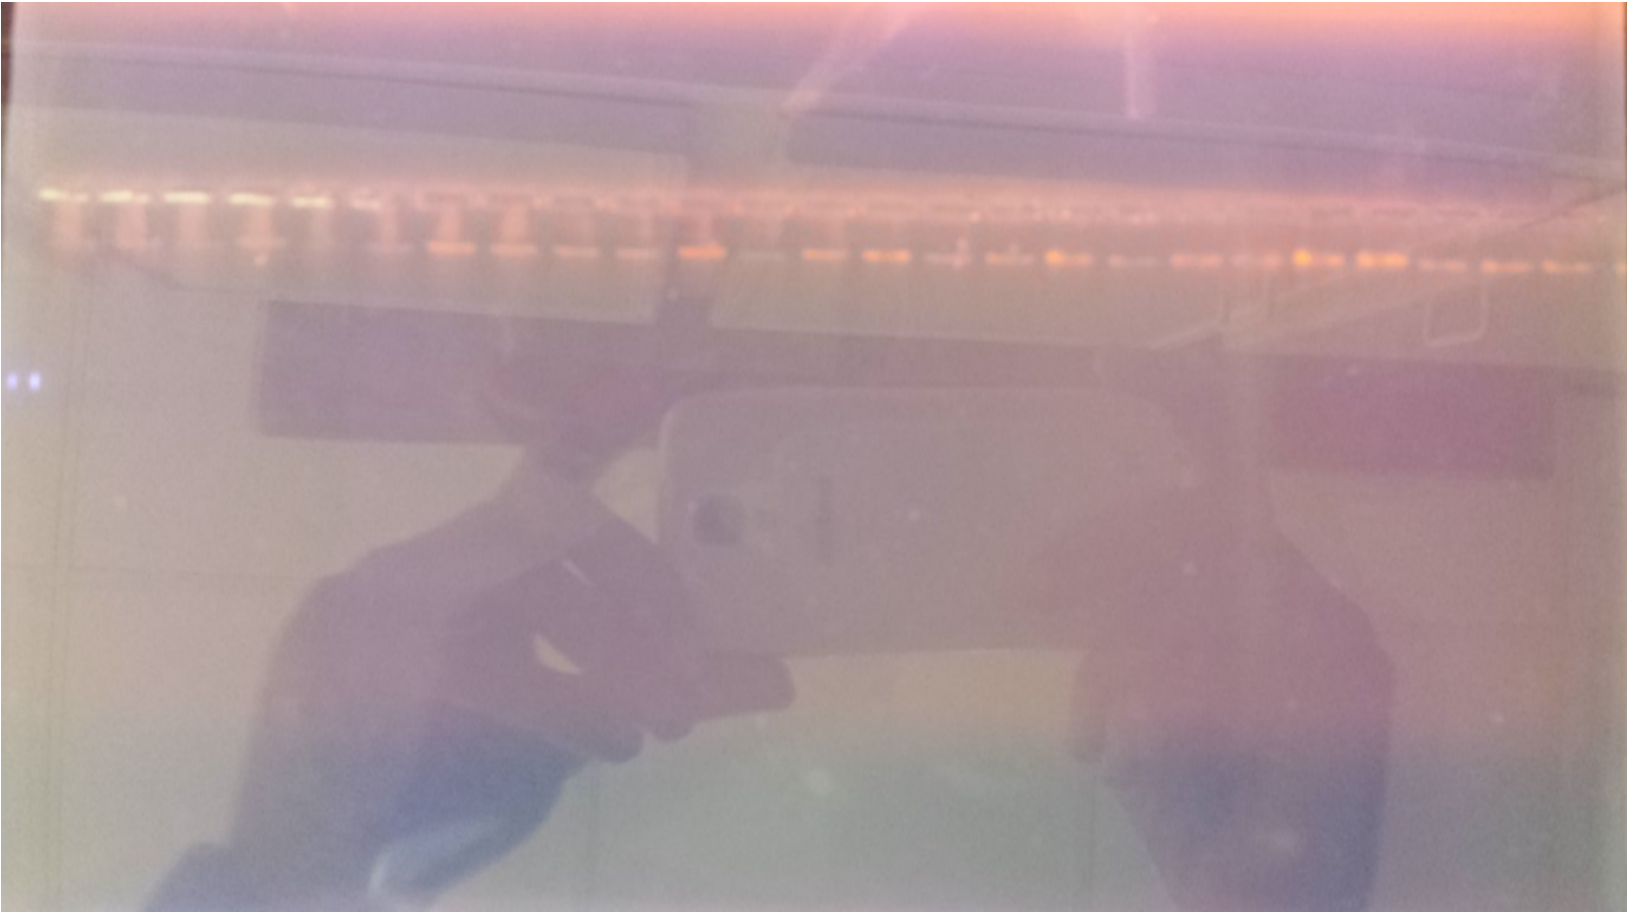

Supplement: Supplementary file [file aab-61-387-2018-supplement.pdf]
